# Supplementary material for: Patients’ preferences in dental care: A discrete-choice experiment and an analysis of willingness-to-pay
Source: PubMed Central journal article supplement (PMC9970100; doi:10.1371/journal.pone.0280441), 2023-02-27
Supplement: pone.0280441.s002.pdf [file pone.0280441.s002.pdf]

## Presentation of the treatment attribute "Aesthetics"

Here we visualized the attribute aesthetics of a dental crown (red arrow) and its levels.

You may place this document next to the questionnaire when filling in. This may make it easier for you to imagine an alternative treatment.

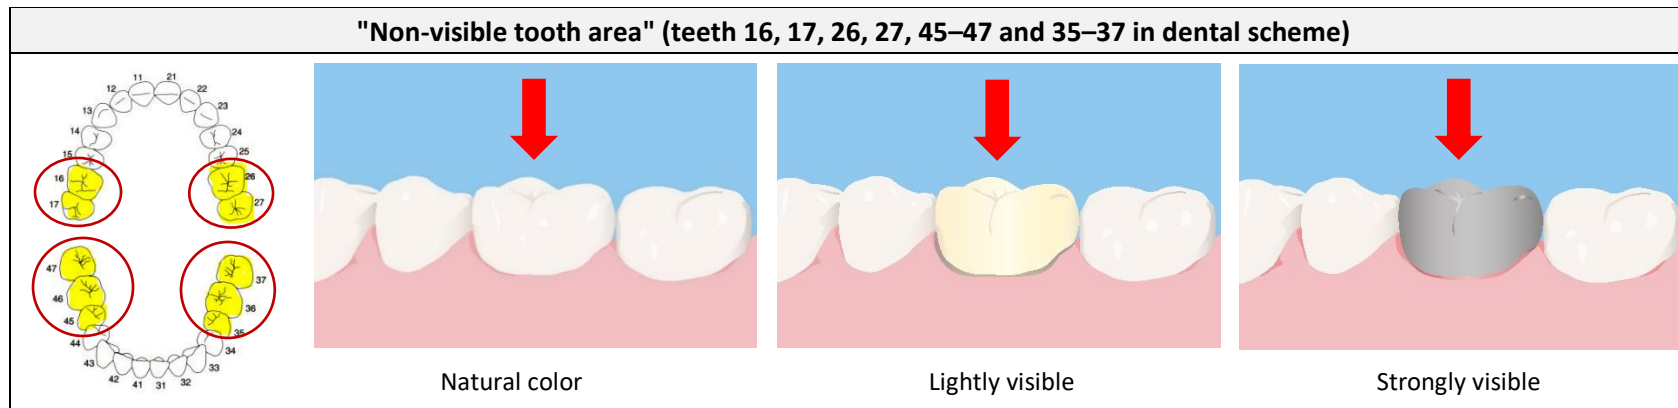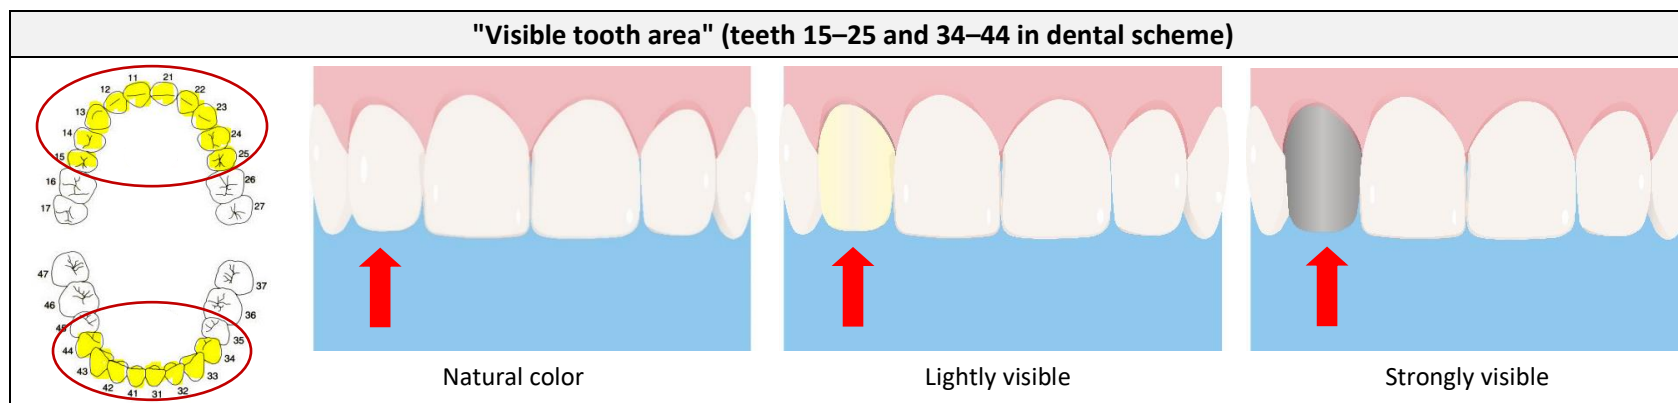

PLEASE NOTE. Using these treatment levels, we are NOT describing ANY CERTAIN TREATMENT or ANY CERTAIN MATERIAL that is common for dental crowns!  
We only want to know how important treatment levels are to you.
